# Supplementary material
Source: ML conference proceedings conference paper supplement (https://proceedings.mlr.press/v108/gessner20a.html)
Supplement: Supplementary file [file gessner20a-supp.pdf]

---

## Supplementary Material

### Integrals over Gaussians under Linear Domain Constraints

---

## A ALGORITHMS

---

**Algorithm 2** Elliptical slice sampling for a linearly constrained standard normal distribution

---

```

1 procedure LINESS( $\mathbf{A}, \mathbf{b}, N, \mathbf{x}_0$ )
2   ensure all( $\mathbf{a}_m^\top \mathbf{x}_0 + b_m > 0 \forall m$ ) // initial vector needs to be in domain
3    $\mathbf{X} = []$  // initialize sample array
4   for  $n = 1, \dots, N$  do
5      $\boldsymbol{\nu} \sim \mathcal{N}(0, \mathbf{I})$ 
6      $\mathbf{x}(\theta) = \mathbf{x}_0 \cos \theta + \boldsymbol{\nu} \sin \theta$  // construct ellipse
7      $\boldsymbol{\theta} \leftarrow \text{sort}(\{\theta_{j,1/2}\}_{j=1}^M)$  s.t.  $\mathbf{a}_j^\top (\mathbf{x}_0 \cos \theta_{j,1/2} + \boldsymbol{\nu} \sin \theta_{j,1/2}) = 0$  //  $2M$  intersections, Eq. (2)
8      $\boldsymbol{\theta}_{\text{act}} \leftarrow \{[\theta_l^{\min}, \theta_l^{\max}]\}_{l=1}^L$  s.t.  $\ell(x(\theta_l^{\min/\max} + d\theta)) - \ell(x(\theta_l^{\min/\max} - d\theta)) = \pm 1$  // Set brackets
9      $u \sim [0, 1] \cdot \sum_l^L (\theta_l^{\max} - \theta_l^{\min})$ 
10     $\theta_u \leftarrow$  transform  $u$  to angle in bracket
11     $\mathbf{X}[n] \leftarrow \mathbf{x}(\theta_u)$  // update sample array
12     $\mathbf{x}_0 \leftarrow \mathbf{x}(\theta_u)$  // set new initial vector
13  end for
14  return  $\mathbf{X}$ 
15 end procedure

```

---

**Algorithm 3** Subset simulation for linear constraints

---

```

1 procedure SUBSETSIM( $\mathbf{A}, \mathbf{b}, N, \rho = \frac{1}{2}$ )
2    $\mathbf{X} \sim \mathcal{N}(0, \mathbf{I})$  //  $N$  initial samples
3    $\gamma, \hat{\rho} = \text{FINDSHIFT}(\rho, \mathbf{X}, \mathbf{A}, \mathbf{b})$  // find new shift value
4    $\log Z = \log \hat{\rho}$  // record the integral
5   while  $\gamma > 0$  do
6      $\mathbf{X} \leftarrow \text{LINESS}(\mathbf{A}, \mathbf{b} + \gamma, N, \mathbf{x}_0)$  // draw new samples from new constrained domain
7      $\gamma, \hat{\rho} \leftarrow \text{FINDSHIFT}(\rho, \mathbf{X}, \mathbf{A}, \mathbf{b})$  // find new shift value
8      $\log Z \leftarrow \log Z + \log \hat{\rho}$  // Update integral with new conditional probability
9   end while
10  return  $\log Z$ , shift sequence
11 end procedure

12 function FINDSHIFT( $\rho, \mathbf{X}, \mathbf{A}, \mathbf{b}$ ) // find shift s.t. a fraction  $\rho$  of  $\mathbf{X}$  fall into the resulting domain.
13    $\boldsymbol{\gamma} \leftarrow \text{SORT}(-\min_m (\mathbf{a}_m^\top \mathbf{x}_n + b_m)_{n=1}^N)$  // sort shifts in ascending order
14    $\gamma \leftarrow (\boldsymbol{\gamma}[\lceil \rho N \rceil] + \boldsymbol{\gamma}[\lceil \rho N \rceil + 1])/2$  // Find shift s.t.  $\rho N$  samples lie in the domain
15    $\hat{\rho} \leftarrow (\#\mathbf{X} \text{ inside})/N$  // true fraction could deviate from  $\rho$ 
16   return  $\gamma, \hat{\rho}$ 
17 end function

```

---

## B DETAILS ON EXPERIMENTS

### B.1 Synthetic experiments

**1000-d integrals** We further consider three similar synthetic integrals over orthants of 1000-d correlated Gaussians with a fixed mean and a randomly drawn covariance matrix. Table 1 shows the mean and std. dev. of the binary logarithm of the integral estimator averaged over five runs of HDR using  $2^8$  samples per nesting for integration, as well as the average CPU time<sup>1</sup>.

Table 1: Integrals of Gaussian orthants in 1000-d

| # | $\langle \log_2 \hat{Z} \rangle$ | std. dev. | $t_{\text{CPU}} [10^3 \text{s}]$ |
|---|----------------------------------|-----------|----------------------------------|
| 1 | -162.35                          | 4.27      | 8.86                             |
| 2 | -160.54                          | 2.09      | 7.40                             |
| 3 | -157.62                          | 3.19      | 7.64                             |

### B.2 Bayesian optimization

**Probability of minimum** After having chosen  $N_R$  representer points, the approximate probability for  $\mathbf{x}_i, i = 1, \dots, N_R$  to be the minimum, Eq. (6) can be rephrased in terms of Eq. (1) by writing the  $N_R - 1$  linear constraints in matrix form. This  $(N_R - 1) \times N_R$  matrix is a  $(N_R - 1) \times (N_R - 1)$  identity matrix with a vector of  $-\mathbf{1}$  added in the  $i^{\text{th}}$  column,

$$\mathbf{M} = \begin{bmatrix} \mathbf{1}_{(i-1) \times (i-1)} & -\mathbf{1}_{i-1} & \mathbf{0}_{(i-1) \times (N_R-i)} \\ \mathbf{0}_{(N_R-i) \times (i-1)} & -\mathbf{1}_{N_R-i} & \mathbf{1}_{(N_R-i) \times (N_R-i)} \end{bmatrix}.$$

Then the objective Eq. (6) can be written as

$$\begin{aligned} \hat{p}_{\min}(\mathbf{x}_i) &= \int \mathcal{N}(\mathbf{f}, \boldsymbol{\mu}, \boldsymbol{\Sigma}) \prod_{j \neq i}^{N_R} \Theta([\mathbf{M}\mathbf{f}]_j) d\mathbf{f} \\ &= \int \mathcal{N}(\mathbf{u}, \mathbf{0}, \mathbf{1}) \prod_{j \neq i}^{N_R} \Theta \left( \left[ \mathbf{M} \left( \boldsymbol{\Sigma}^{1/2} \mathbf{u} + \boldsymbol{\mu} \right) \right]_j \right) d\mathbf{u} \end{aligned}$$

where we have done the substitution  $\mathbf{u} = \boldsymbol{\Sigma}^{-1/2}(\mathbf{f} - \boldsymbol{\mu})$ , and hence  $\mathbf{f} = \boldsymbol{\Sigma}^{1/2} \mathbf{u} + \boldsymbol{\mu}$ . Writing the constraints in matrix form as in Section 2,  $\mathbf{A}^\top = \mathbf{M}\boldsymbol{\Sigma}^{1/2}$  and  $\mathbf{b} = \mathbf{M}\boldsymbol{\mu}$ .

**Derivatives** In order to compute a first-order approximation to the objective function in entropy search, we need the derivatives of  $\hat{p}_{\min}$  w.r.t. the parameters  $\boldsymbol{\mu}$  and  $\boldsymbol{\Sigma}$ . The algorithm requires the following derivative, where  $\lambda = \{\boldsymbol{\mu}, \boldsymbol{\Sigma}\}$ ,

$$\begin{aligned} \frac{d}{d\lambda} \log p_{\min} &\approx \frac{1}{\hat{p}_{\min}} \frac{d\hat{p}_{\min}}{d\lambda} \\ &= \frac{1}{\hat{p}_{\min}} \int d\mathbf{f} \frac{d\mathcal{N}(\mathbf{f}, \boldsymbol{\mu}, \boldsymbol{\Sigma})}{d\lambda} \prod_{j \neq i}^{N_R} \Theta([\mathbf{M}\mathbf{f}]_j) \\ &= \frac{1}{\hat{p}_{\min}} \mathbb{E} \left[ \frac{d \log \mathcal{N}(\mathbf{f}, \boldsymbol{\mu}, \boldsymbol{\Sigma})}{d\lambda} \right], \end{aligned}$$

using  $\frac{d\mathcal{N}(\mathbf{f}, \boldsymbol{\mu}, \boldsymbol{\Sigma})}{d\lambda} = \mathcal{N}(\mathbf{f}, \boldsymbol{\mu}, \boldsymbol{\Sigma}) \frac{d \log \mathcal{N}(\mathbf{f}, \boldsymbol{\mu}, \boldsymbol{\Sigma})}{d\lambda}$ . Hence all we need is to compute the derivatives of the log normal distribution w.r.t. its parameters, and the expected values thereof w.r.t. the integrand. The required derivatives are

$$\frac{d \log \mathcal{N}(\mathbf{f}, \boldsymbol{\mu}, \boldsymbol{\Sigma})}{d\mu_i} = [\boldsymbol{\Sigma}^{-1}(\mathbf{f} - \boldsymbol{\mu})]_i,$$

$$\frac{d \log \mathcal{N}(\mathbf{f}, \boldsymbol{\mu}, \boldsymbol{\Sigma})}{d\boldsymbol{\Sigma}_{ij}} = \frac{1}{2} [\boldsymbol{\Sigma}^{-1}(\mathbf{f} - \boldsymbol{\mu})(\mathbf{f} - \boldsymbol{\mu})^\top \boldsymbol{\Sigma}^{-1} - \boldsymbol{\Sigma}^{-1}]_{ij}$$

and the second derivative

$$\begin{aligned} \frac{d^2 \mathcal{N}(\mathbf{f}, \boldsymbol{\mu}, \boldsymbol{\Sigma})}{d\mu_i d\mu_j} \\ = \mathcal{N}(\mathbf{f}, \boldsymbol{\mu}, \boldsymbol{\Sigma}) \left( [\boldsymbol{\Sigma}^{-1}(\mathbf{f} - \boldsymbol{\mu})(\mathbf{f} - \boldsymbol{\mu})^\top \boldsymbol{\Sigma}^{-1} - \boldsymbol{\Sigma}^{-1}]_{ij} \right) \end{aligned}$$

Hence we only need  $\mathbb{E}_{p_{\min}}[(\mathbf{f} - \boldsymbol{\mu})]$  and  $\mathbb{E}_{p_{\min}}[(\mathbf{f} - \boldsymbol{\mu})(\mathbf{f} - \boldsymbol{\mu})^\top]$  to compute the following gradients,

$$\frac{d \log p_{\min}}{d\mu_i} \approx \frac{1}{\hat{p}_{\min}} \mathbb{E}_{\hat{p}_{\min}} \left[ [\boldsymbol{\Sigma}^{-1}(\mathbf{f} - \boldsymbol{\mu})]_i \right],$$

$$\begin{aligned} \frac{d \log p_{\min}}{d\boldsymbol{\Sigma}_{ij}} &\approx \\ \frac{1}{\hat{p}_{\min}} \mathbb{E}_{\hat{p}_{\min}} \left[ \frac{1}{2} [\boldsymbol{\Sigma}^{-1}(\mathbf{f} - \boldsymbol{\mu})(\mathbf{f} - \boldsymbol{\mu})^\top \boldsymbol{\Sigma}^{-1} - \boldsymbol{\Sigma}^{-1}]_{ij} \right], \end{aligned}$$

and the Hessian w.r.t.  $\boldsymbol{\mu}$ ,

$$\frac{d^2 \log p_{\min}}{d\mu_i d\mu_j} = 2 \frac{d \log \hat{p}_{\min}}{d\boldsymbol{\Sigma}_{ij}} - \frac{d \log p_{\min}}{d\mu_i} \frac{d \log p_{\min}}{d\mu_j}.$$

<sup>1</sup>On 6 CPUs, the wall clock time was  $\sim 20$  min per run.
